# Supplementary material for: Engineering molecular self-assembly of perylene diimide through pH-responsive chiroptical switching
Source: Royal Society of Chemistry journal article supplement (doi:10.1039/c6me00012f), 2016-01-01
Supplement: c6me00012f1.pdf [file c6me00012f1.pdf]

**Electronic Supplementary Information**

**Engineering Molecular Self-Assembly of Perylene Diimide Through  
pH-responsive Chiroptical Switching†**

M. Pandeewar and T. Govindaraju\*

*Bioorganic Chemistry Laboratory, New Chemistry Unit, Jawaharlal Nehru Centre for  
Advanced Scientific Research, Jakkur P.O., Bengaluru 560064, India. Fax: +91 80  
22082627; E-mail: tgraju@jncasr.ac.in*

**Contents**

Experimental section

Materials and methods

Synthetic procedure and characterisation of **HPH**

pH responsive UV-vis absorption spectra of **HPH**

pH responsive fluorescence emission spectra of **HPH**

pH responsive CD spectra of **HPH**

<sup>1</sup>H and <sup>13</sup>C NMR spectra of **HPH**

HRMS spectra of **HPH**

References

## Experimental section

### Materials and methods

**Materials.** 3,4,9,10-Perylenetetracarboxylic dianhydride (PDA), L-histidine and imidazole were obtained from Sigma-Aldrich. All other reagents and solvents utilized in the experiments were of reagent and spectroscopic grades and used as received without further purification unless otherwise mentioned. Milli-Q water was used in all the experiments.

**Absorption Spectroscopy.** UV–vis absorption spectra of **HPH** (50  $\mu$ M solution in Milli-Q water) were recorded on a Perkin Elmer Model Lambda 900 spectrophotometer by using quartz cuvette of 10 mm path length.

**Fluorescence emission Spectroscopy.** Fluorescence emission spectra of **HPH** (50  $\mu$ M solution in Milli-Q water) were recorded on a Perkin Elmer Model LS 55 spectrophotometer by using quartz cuvette of 10 mm path length. All fluorescence spectra were recorded with excitation wavelength of  $\lambda_{\text{ex}} = 480$  nm.

**Circular Dichroism (CD).** CD measurements of **HPH** (50  $\mu$ M solution in Milli-Q water) were carried out on a Jasco J-815 spectropolarimeter under nitrogen atmosphere by using quartz cuvette of 10 mm path length. Isodesmic model fitting was carried out by reported method.<sup>1</sup> The obtained temperature versus CD intensity (mdeg) at 572 nm data is normalized between 0 and 1 using the below mentioned formula.

$$\alpha(T) = \theta_T - \theta_M / \theta_{\text{agg}} - \theta_M$$

Where,  $\alpha(T)$  is the fraction of aggregation,  $\theta_T$  is the CD effect (mdeg) at a given temperature T,  $\theta_M$  is the CD effect (mdeg) at high temperature corresponding to the monomer,  $\theta_{\text{agg}}$  is the CD effect (mdeg) at low temperatures corresponding to the aggregated state.

The fraction of aggregation ( $\alpha(T)$ ) versus temperature curve was fitted to the isodesmic model using the Boltzman equation.

$$y = A2 + (A1-A2)/(1 + \exp((x-x_0)/dx))$$

Where A1 = minimum value of the  $\alpha(T)$

A2 = maximum value of the  $\alpha(T)$

$x_0$  = melting temperature (  $T_m$  at  $\alpha(T)= 0.5$ )

$dx$  = characteristic temperature that is related to the slope of the function at the melting temperature.

The average stack length of the aggregates ( $DP_N$ ) was calculated using equations

$$DPN= 1/(1-\alpha(T))^{1/2}$$

**NMR Spectroscopy.**  $^1H$  and  $^{13}C$  NMR spectra were recorded on a Bruker AV-400 spectrometer with chemical shifts reported as ppm (in DMSO- $d_6$  with tetramethylsilane as internal standard).

**Mass Spectrometry (MS).** High resolution mass spectra (HRMS) were obtained from Agilent Technologies 6538 UHD Accurate-Mass Q-TOF LC/MS spectrometer.

**Field Emission Scanning Electron Microscopy (FESEM).** FESEM images were acquired with a FEI Nova nanoSEM-600 equipped with a field-emission gun operating at 15 kV. The samples were prepared by drop casting of respective solutions onto a Si (111) substrate and dried in air followed by vacuum drying at room temperature.

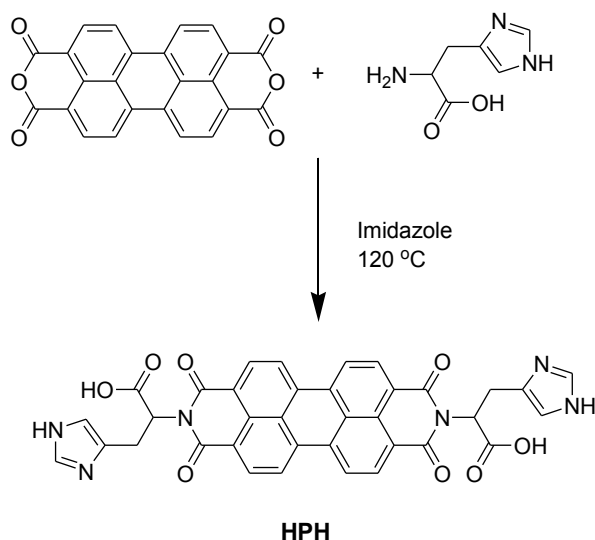

### Synthetic procedure and characterisation of HPH<sup>2</sup>

3,4,9,10-Perylenetetracarboxylic dianhydride (PDA) (500 mg, 1.2 mmol), L-histidine (435 mg, 2.5 mmol), and imidazole (2.0 g) were added into a round bottom flask followed by heating at 120 °C for 1 h under vigorous stirring and nitrogen atmosphere. The reaction mixture was allowed to cool to 90 °C, transferred into Milli-Q water and filtered. The filtrate was acidified with 2.0 N HCl, and the precipitate was filtered, washed with excess of methanol, Milli-Q water, acetone and dried under vacuum at 42 °C to obtain the product **HPH** in good yield (76%). <sup>1</sup>H NMR (*DMSO-d*<sub>6</sub>, 400 MHz)  $\delta_{\text{H}}$  14.01 (2H, br), 8.92 (2H, d), 8.64 (4H, s), 8.40 (4H, br), 7.43 (2H, s), 5.86 (2H, q), 3.71 (2H, dd), 3.46 (2H, dd); <sup>13</sup>C NMR (*DMSO-d*<sub>6</sub>, 100 MHz)  $\delta_{\text{C}}$  169.6, 162.1, 134.0, 133.7, 131.2, 129.7, 128.2, 123.8, 121.7, 119.1, 116.8, 52.6, 23.8; Elemental analysis: Found C, 64.88; H, 3.35; N, 12.60; calcd C, 64.86; H, 3.33; N, 12.61 for C<sub>36</sub>H<sub>22</sub>N<sub>6</sub>O<sub>8</sub>; HR-MS: m/z found 667.1567 [M+H]<sup>+</sup>; calcd. 666.1499 for C<sub>36</sub>H<sub>22</sub>N<sub>6</sub>O<sub>8</sub>.

pH responsive UV-vis absorption spectra of **HPH**

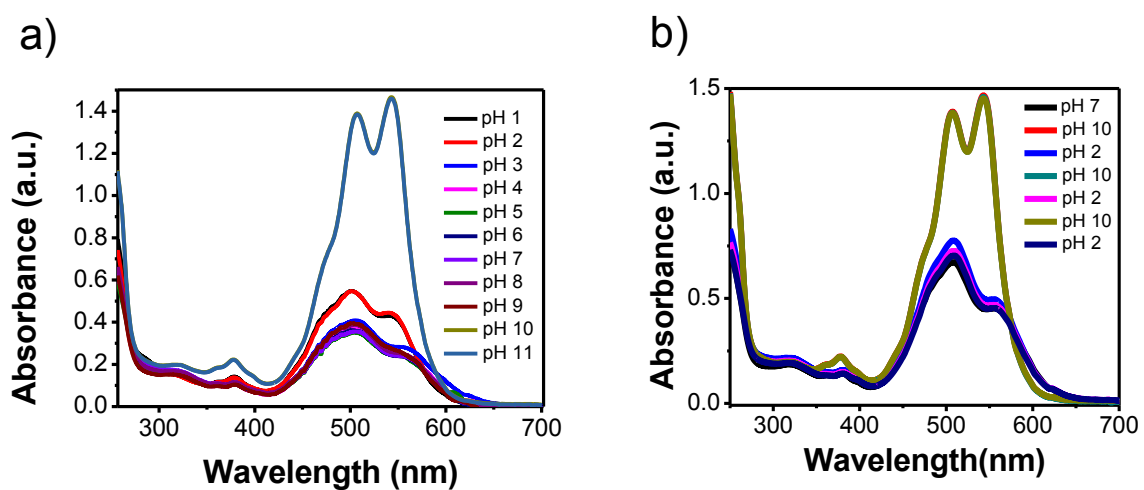

**Figure S1.** a) pH dependent UV-vis absorption spectra of **HPH**. b) pH responsive reversible absorption switching spectra of **HPH**.

pH responsive fluorescence emission spectra of **HPH**

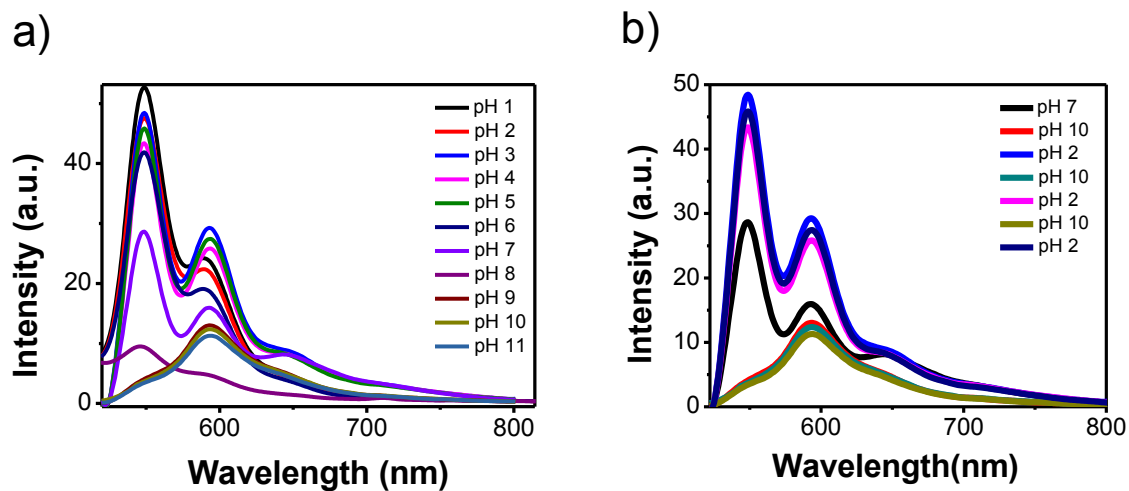

**Figure S2.** a) pH dependent Fluorescence emission spectra of **HPH**. b) pH responsive reversible emission switching spectra of **HPH**.

pH responsive CD spectra of **HPH**

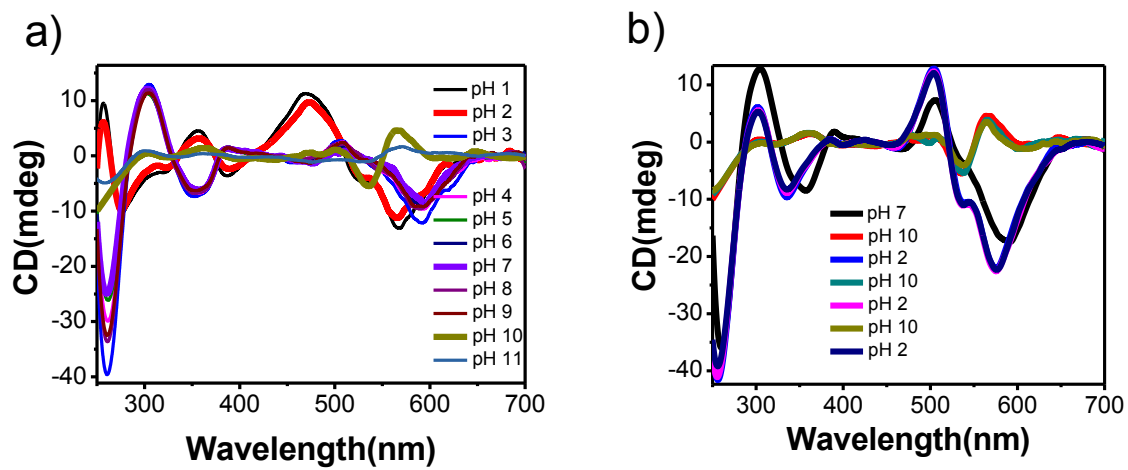

**Figure S3.** a) pH dependent CD spectra of **HPH**. b) pH responsive reversible chirooptical switching spectra of **HPH**.

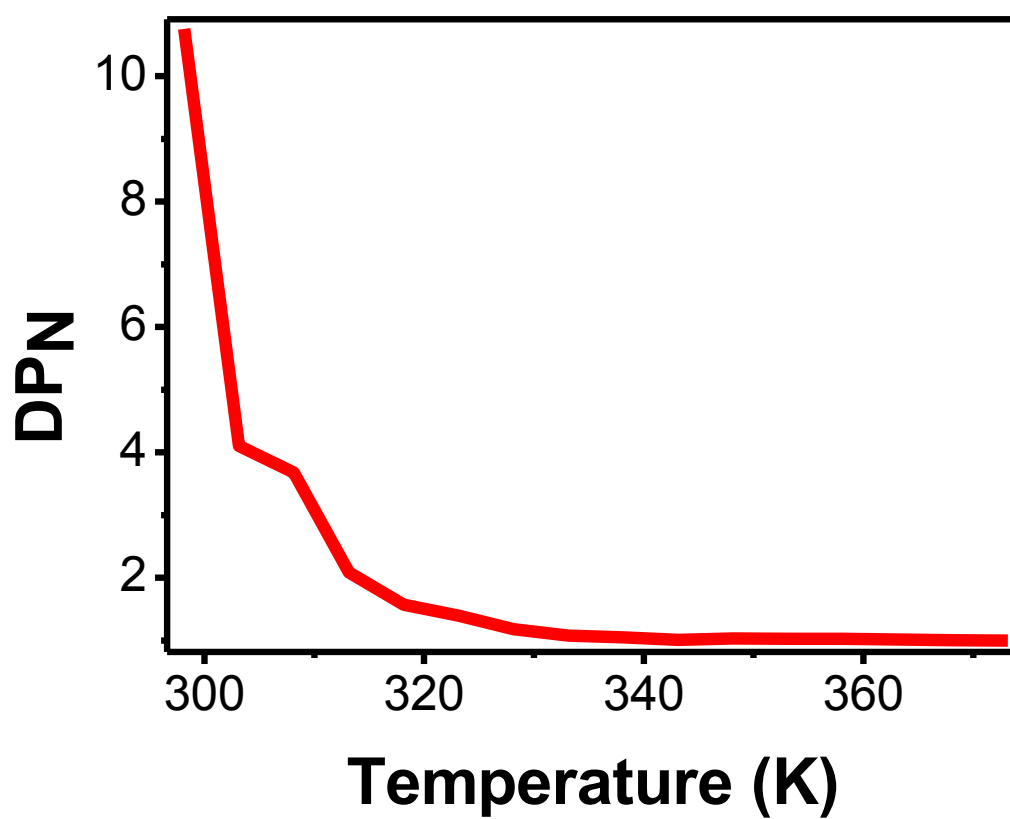

**Figure S4.** The Plot of average stack length ( $DP_N$ ) for **HPH** in water as a function of temperature.

$^1\text{H}$  NMR spectra (DMSO-*d*<sub>6</sub>, 400 MHz) of **HPH**

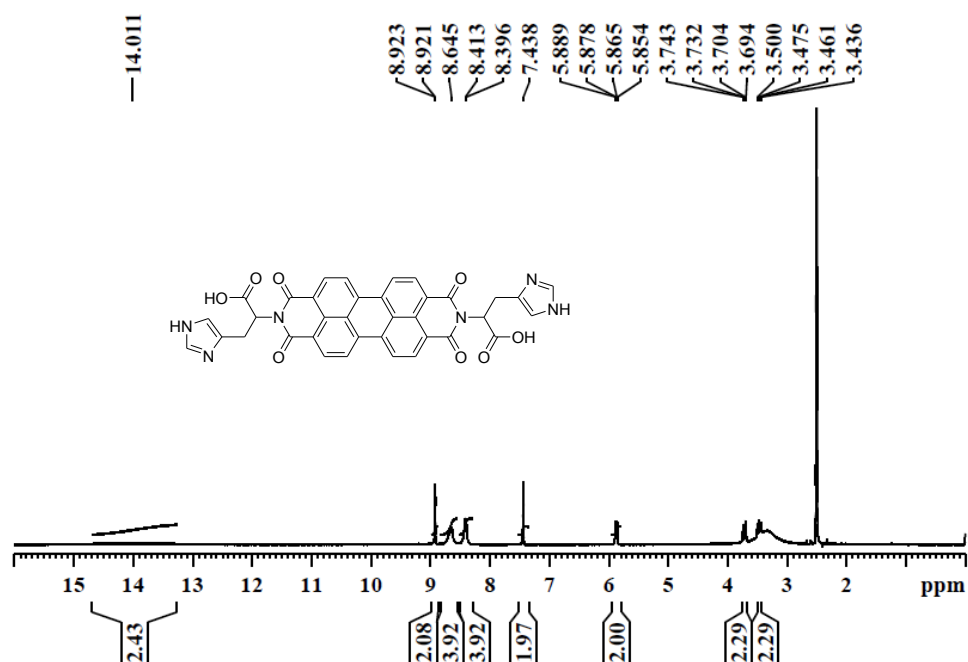

$^{13}\text{C}$  NMR spectra (DMSO-*d*<sub>6</sub>, 100 MHz) of **HPH**

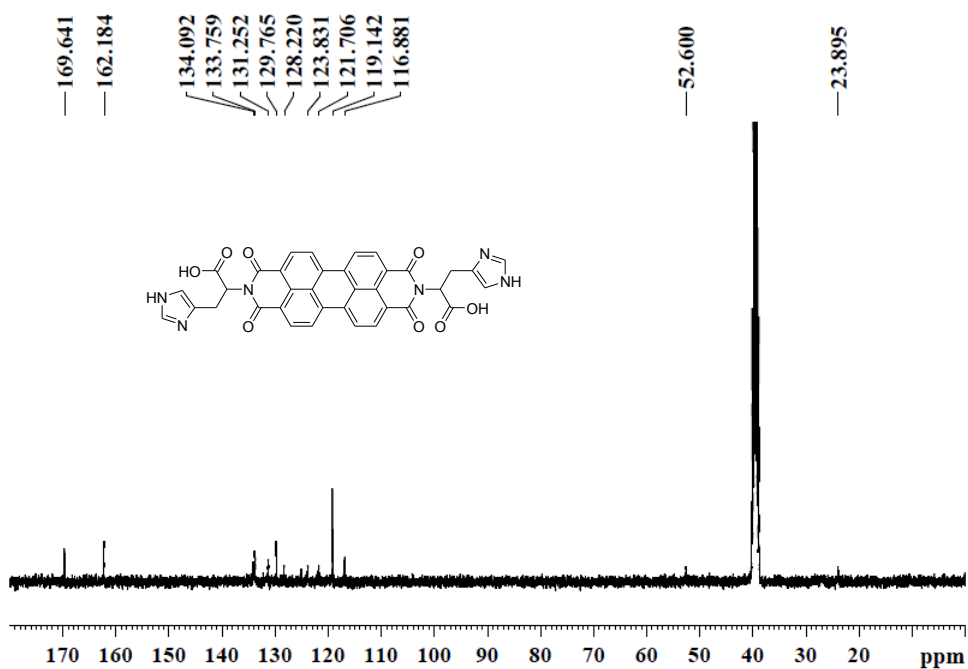

## HRMS of HPH

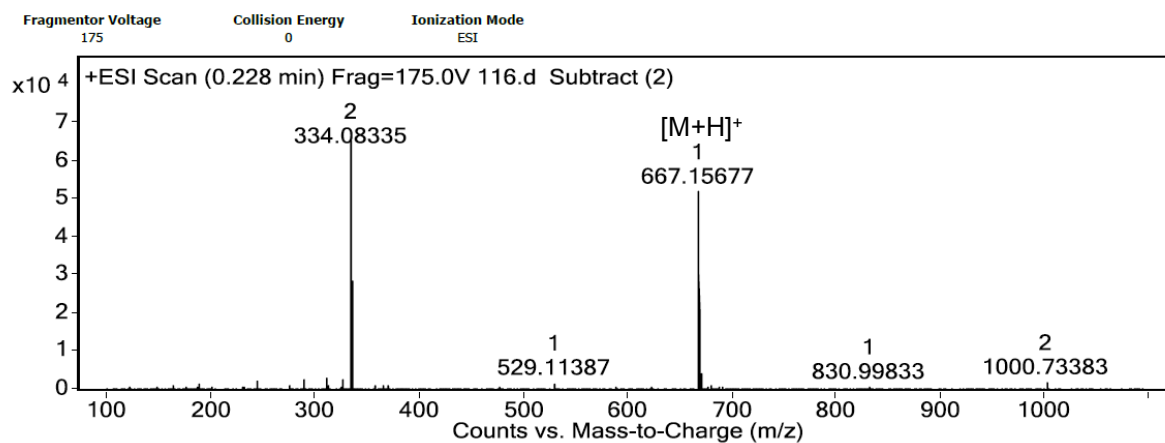

## References

1. (a) N. Ponnuswamy, G. D. Pantos, M. M. Smulders and J. K. Sanders, *J. Am. Chem. Soc.*, 2012, **134**, 566-573; (b) M. M. J. Smulders, M. M. L. Nieuwenhuizen, T. F. A. de Greef, P. van der Schoot, A. P. H. J. Schenning and E. W. Meijer, *Chem. - Eur. J.*, 2010, **16**, 362-367.
2. A. K. Dwivedi, M. Pandeewar and T. Govindaraju, *ACS Appl. Mater. Interfaces*, 2014, **6**, 21369-21379.
